# Supplementary material for: Bromelain Inhibits Allergic Sensitization and Murine Asthma via Modulation of Dendritic Cells
Source: Hindawi journal article supplement (doi:10.1155/2013/702196), 2013-01-01
Supplement: f1 [file 702196.f1.zip]

**Supplemental Table 1**

|                                         | <b>PBS</b>     | <b>sBr</b>     | <b>Sig</b> |
|-----------------------------------------|----------------|----------------|------------|
| <b>Liver Function</b>                   |                |                |            |
| <b>AST</b>                              | 41.2 $\pm$ 14  | 41.8 $\pm$ 12  | $P = 0.94$ |
| <b>ALP</b>                              | 83.6 $\pm$ 11  | 60.4 $\pm$ 12  | $P = 0.05$ |
| <b>Total Protein</b>                    | 4.77 $\pm$ 0.2 | 3.42 $\pm$ 0.2 | $P = 0.15$ |
| <b>Albumin</b>                          | 5.40 $\pm$ 1.5 | 5.20 $\pm$ 0.7 | $P = 0.21$ |
| <b>Lung Injury</b>                      |                |                |            |
|                                         |                |                |            |
| <b>BAL BCA (pg/ml)</b>                  | 166 $\pm$ 27   | 129 $\pm$ 10   | $P = 0.05$ |
| <b>BAL Total WBC (x 10<sup>4</sup>)</b> | 4.7 $\pm$ 4.0  | 5.6 $\pm$ 3.4  | $P = 0.19$ |
|                                         |                |                |            |
