# Supplementary figures and images for: Bromelain Inhibits Allergic Sensitization and Murine Asthma via Modulation of Dendritic Cells
Source: Hindawi journal article supplement (doi:10.1155/2013/702196), 2013-01-01

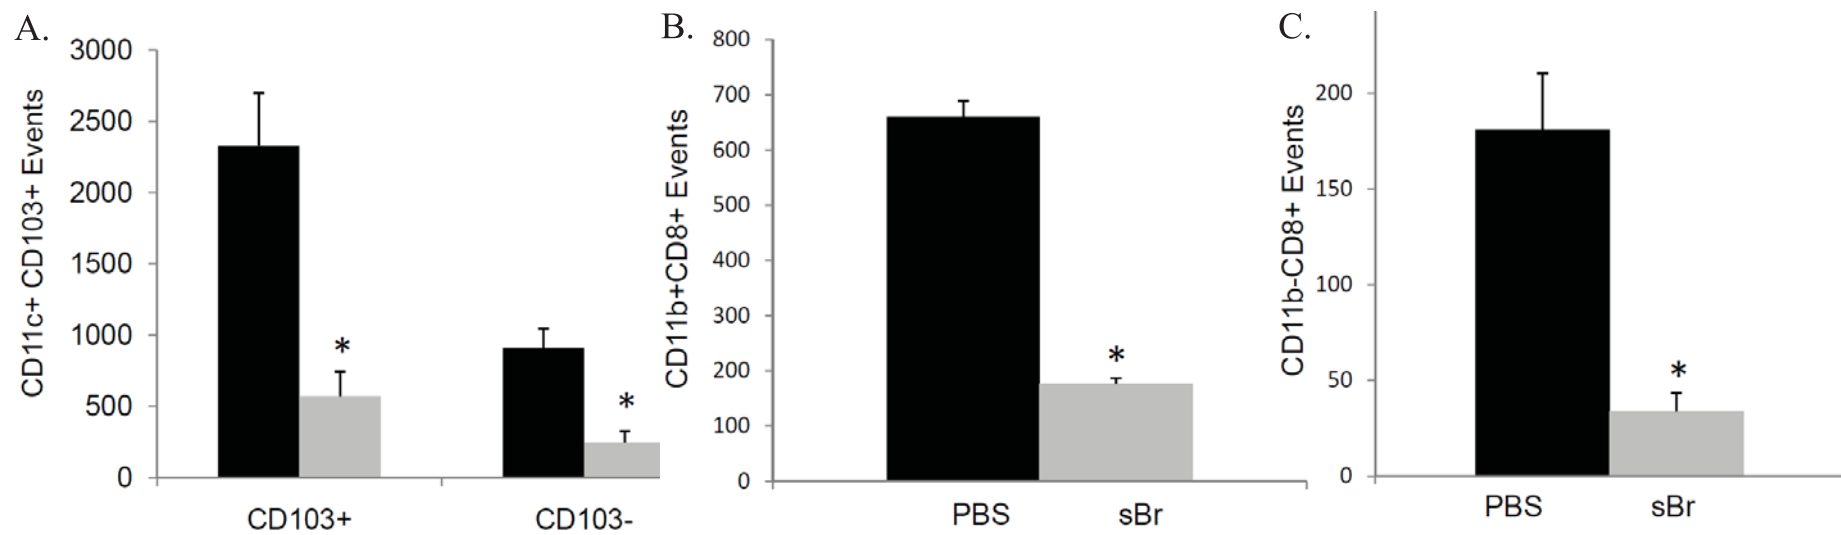

Supplement: f1 [file 702196.f1.zip]

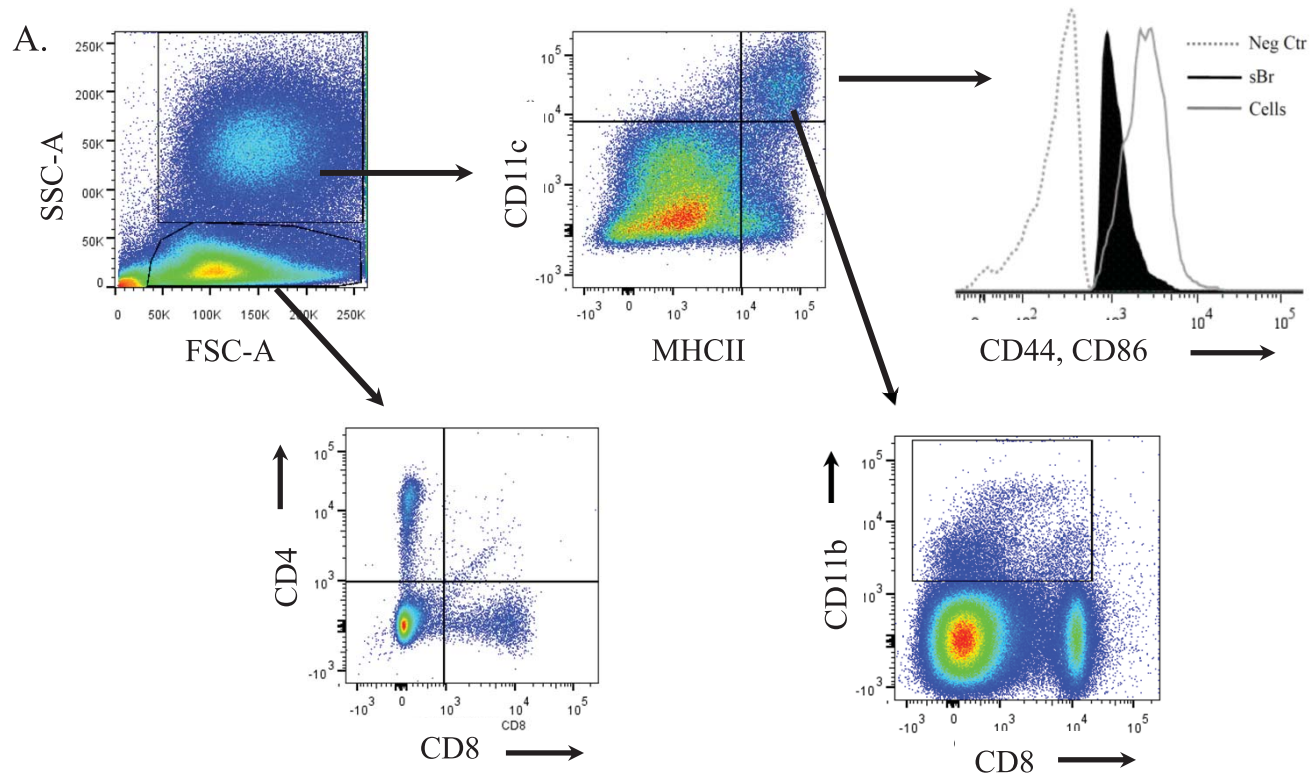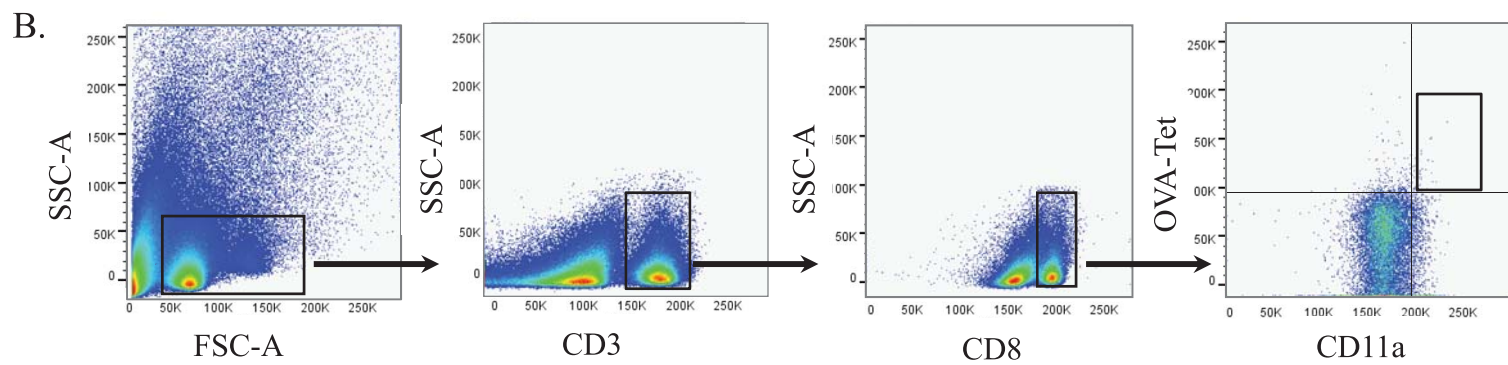

Supplement: f1 [file 702196.f1.zip]

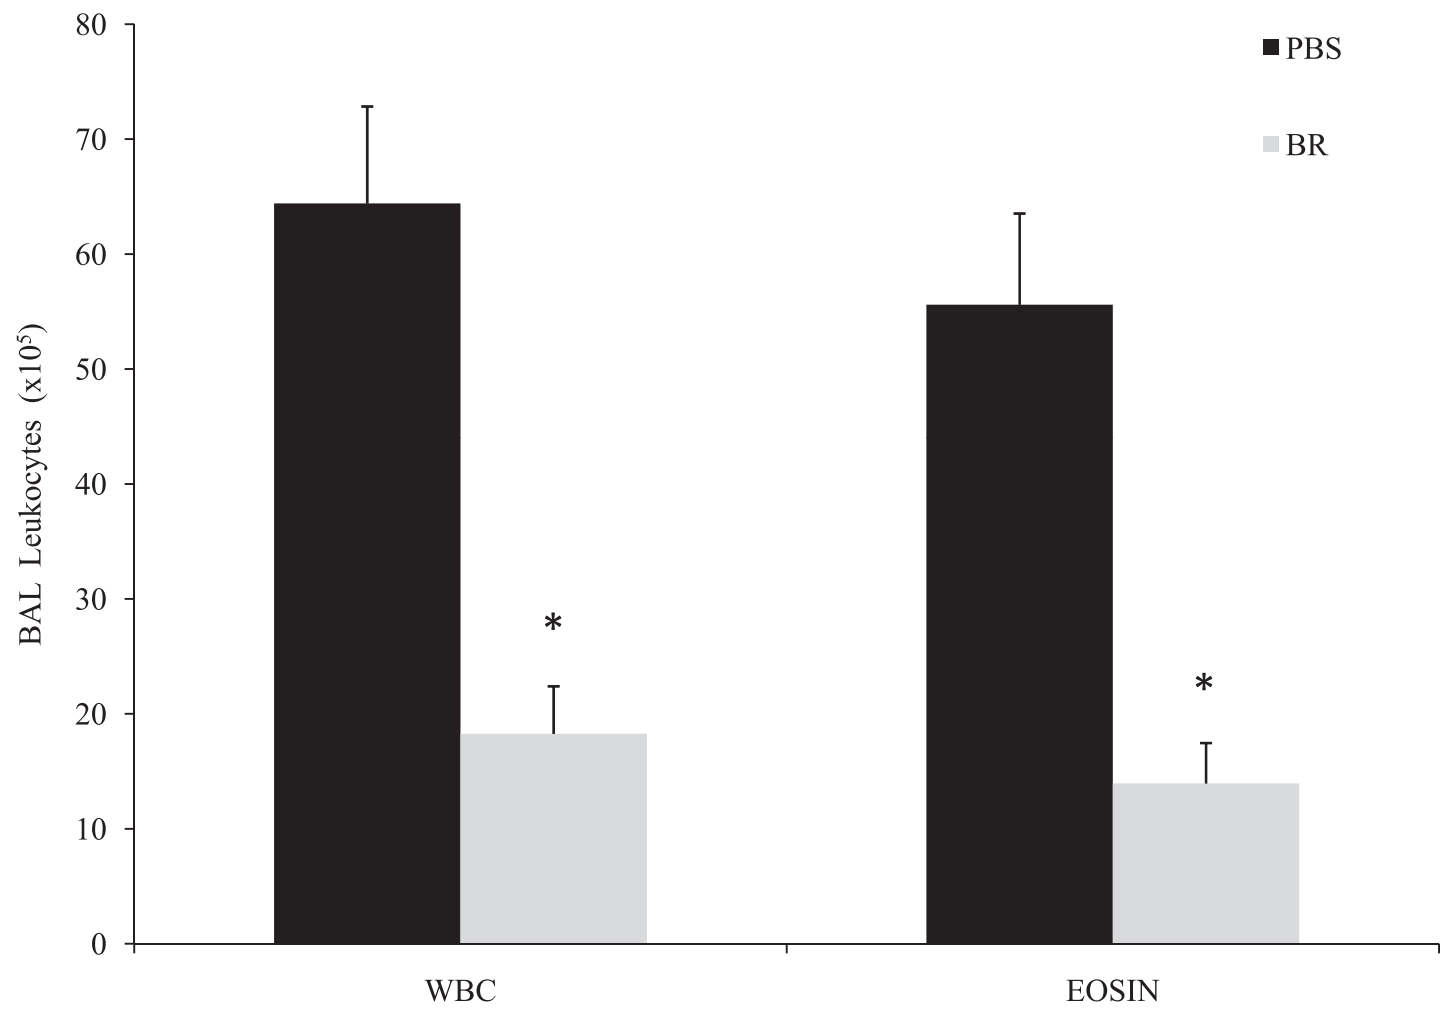

Supplement: f1 [file 702196.f1.zip]

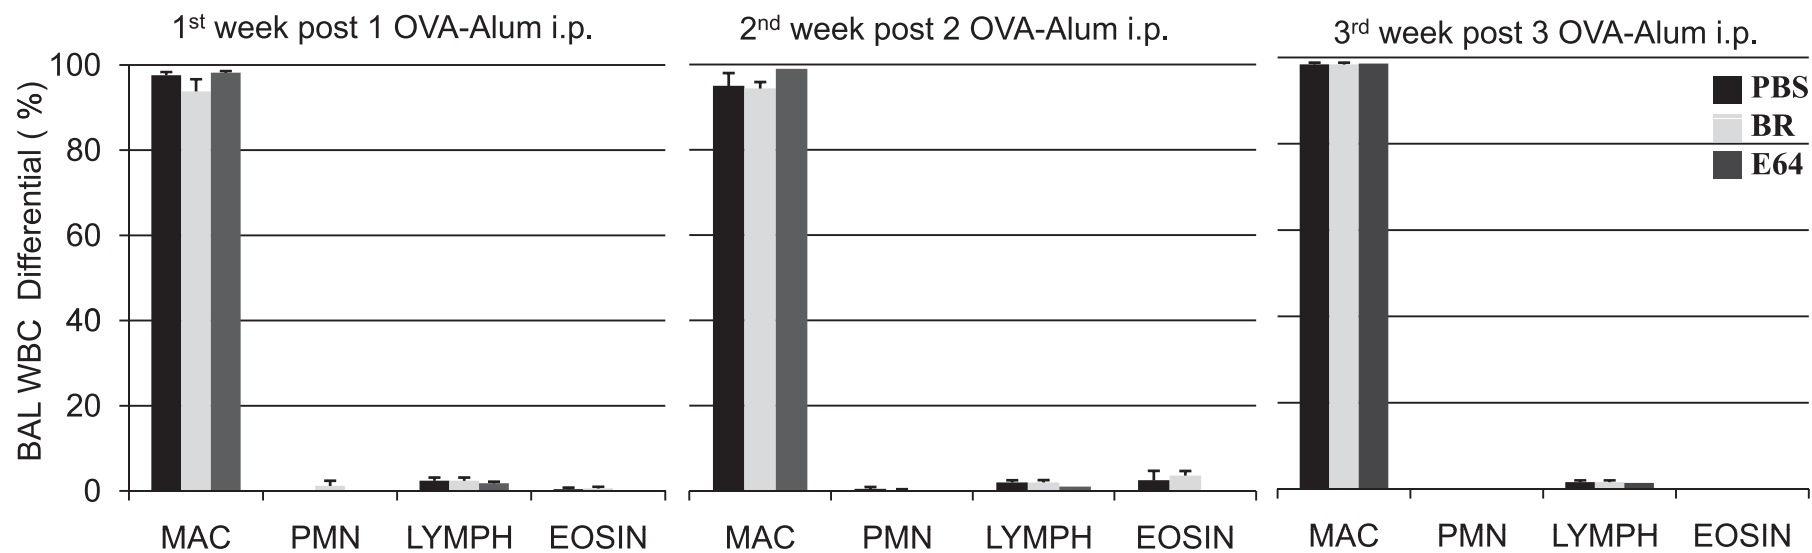

Supplement: f1 [file 702196.f1.zip]
